# Supplementary material
Source: PubMed Central journal article supplement (PMC3674580)
Supplement: NIHMS361147-supplement-01.pdf [file NIHMS361147-supplement-01.pdf]

## Habitual Alcohol Seeking: Time Course and the Contribution of Subregions of the Dorsal Striatum

### Supplemental Information

#### Instrumental Training

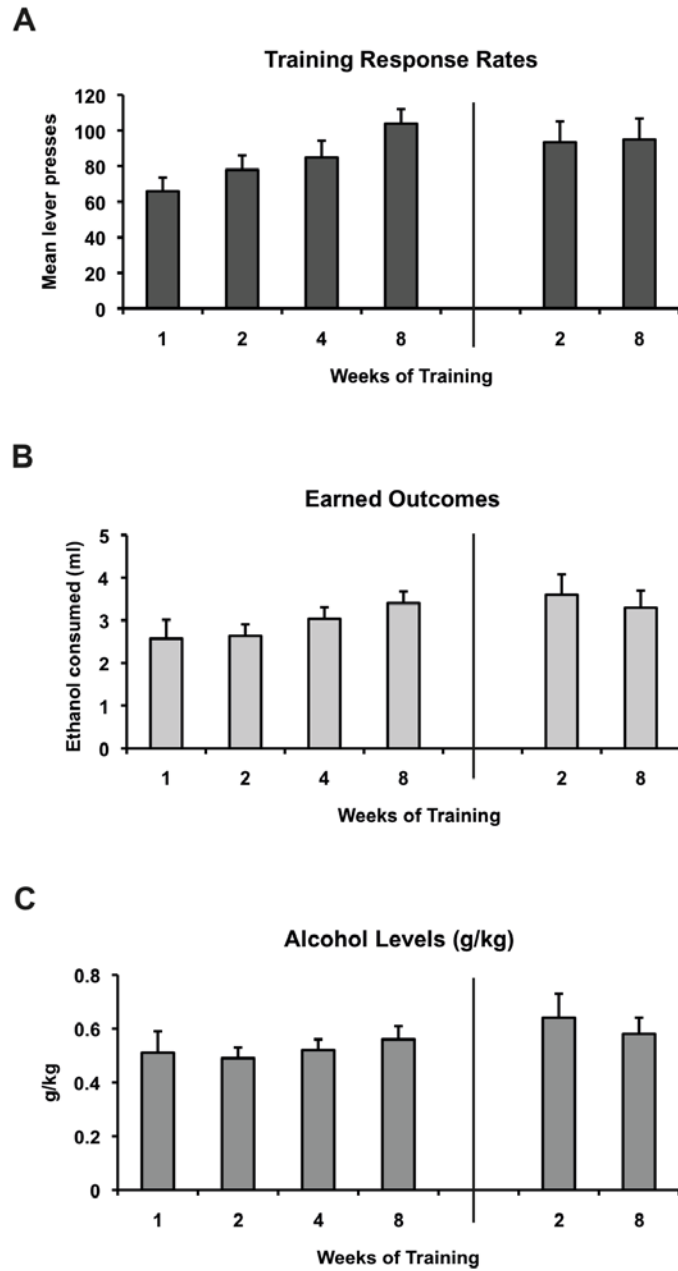

**Figure S1.** Response rates and ethanol consumed during training (Experiments 1a & 1b). (A) Mean lever presses per session for the three training days prior to devaluation testing conducted following 1, 2, 4 and 8 weeks of training for Experiment 1a (left), or following either 2 or 8

weeks for Experiment 1b (right). **(B)** Mean volume of ethanol earned and consumed during the same training sessions. **(C)** Mean alcohol levels (g/kg) achieved as a result of consumption of the earned ethanol outcomes. When rats underwent repeated testing (Experiment 1a) there was an increase in response rates and earned outcomes across training [ $F(3,48) = 23.7, p < .01$ ;  $F(3,48) = 3.7, p < .05$ ] but there was no significant change in g/kg [ $F(3,48) = .8, p > .05$ ] suggesting rats earned more alcohol to compensate for increasing body weight. No differences were found in any of these measures when separate groups of rats underwent a single set of tests at either 2 or 8 weeks [response rate:  $F(1,21) = 2.1, p > .05$ ; earned outcomes:  $F(1,21) = 2.0, p > .05$ ; g/kg:  $F(1,21) = 3.0, p > .05$ ].

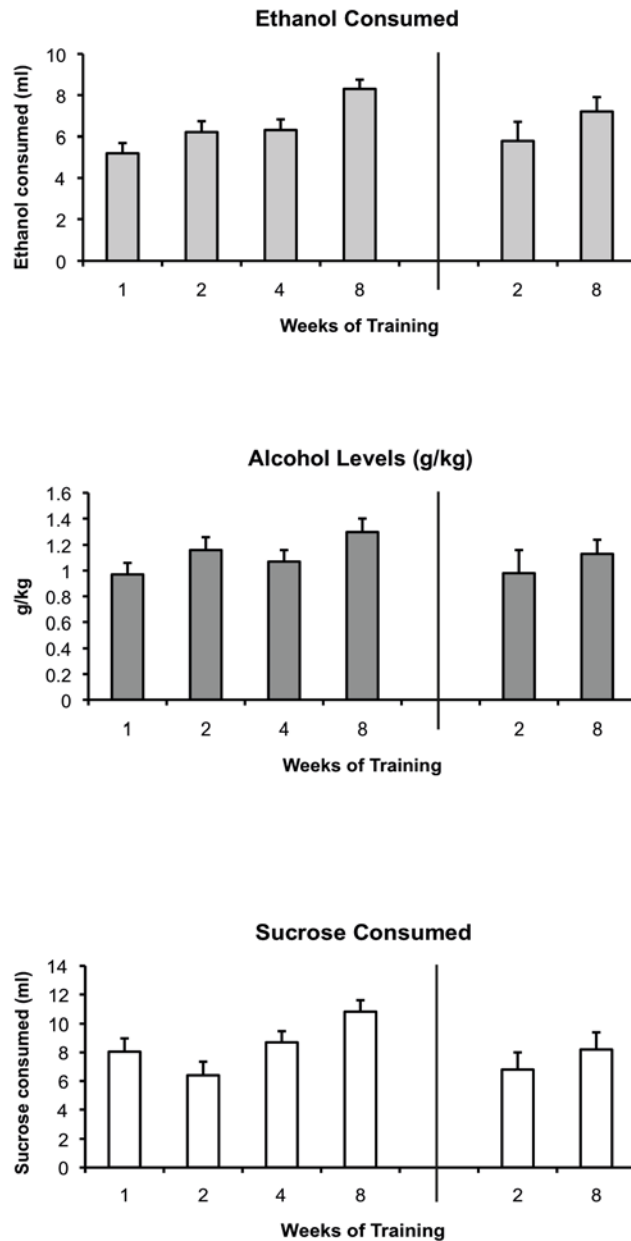

**Figure S2.** Ethanol and sucrose consumed during pre-feeding for devaluation testing (Experiments 1a & 1b). **(A)** Mean ethanol consumed (mls) during the pre-feeding for devaluation tests conducted following 1, 2, 4 and 8 weeks of training for Experiment 1a (left), or following either 2 or 8 weeks for Experiment 1b (right). **(B)** Mean alcohol levels (g/kg) achieved as a result of consumption during pre-feeding. **(C)** Mean sucrose consumed (mls) as the control pre-feeding condition for tests conducted following 1, 2, 4 and 8 weeks of training for Experiment 1a (left), or following either 2 or 8 weeks for Experiment 1b (right). When rats underwent repeated testing (Experiment 1a) there was an increase in consumption of both ethanol [ $F(3,48) = 6.6, p < .01$ ] and sucrose [ $F(3,48) = 9.9, p < .01$ ] during pre-feeding for devaluation testing but the alcohol level achieved (g/kg) did not increase significantly [ $F(3,48) = 2.7, p > .05$ ]. No differences in consumption of ethanol [ $F(1,21) = 2.3, p > .05$ ] or sucrose [ $F(1,21) = .5, p > .05$ ] were found when separate groups of rats underwent a single pair of tests at either 2 or 8 weeks.

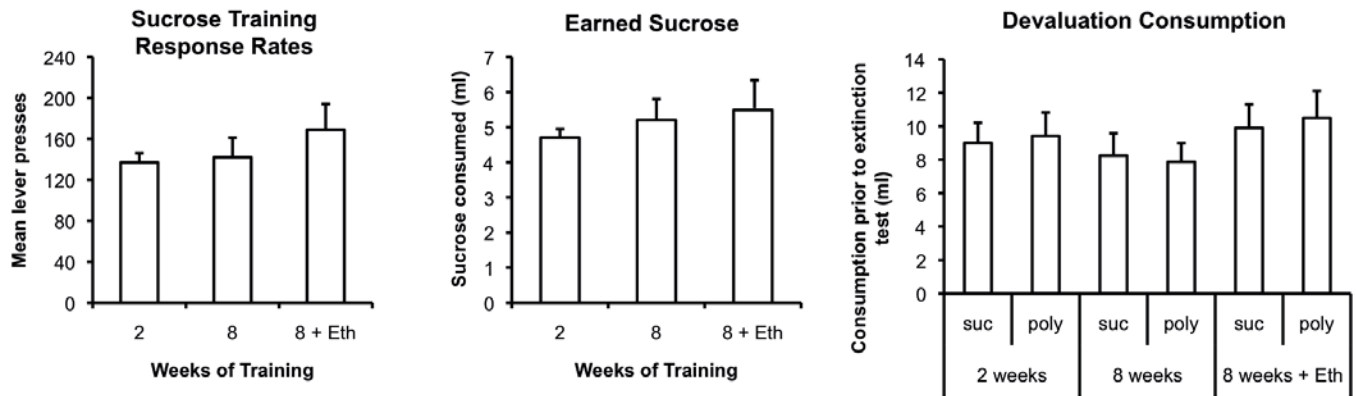

**Figure S3.** Response rates and earned sucrose (Experiment 1c). **(A)** Mean lever presses per session for the three training days prior to devaluation testing conducted following either 2 or 8 weeks of training or 8 weeks with homecage ethanol. **(B)** Mean volume of sucrose earned and consumed during the same training sessions. **(C)** Mean consumption of sucrose or polycose during the pre-feeding for devaluation tests conducted following either 2 or 8 weeks of training. There were no differences in response rates or sucrose earned between the groups [ $F(2,29) = 1.7$ ,  $p > .05$ ;  $F(2,29) = .13$ ,  $p > .05$ ]. Rats consumed similar volumes of sucrose and polycose during devaluation testing [ $F(2,29) = .38$ ,  $p > .05$ ].

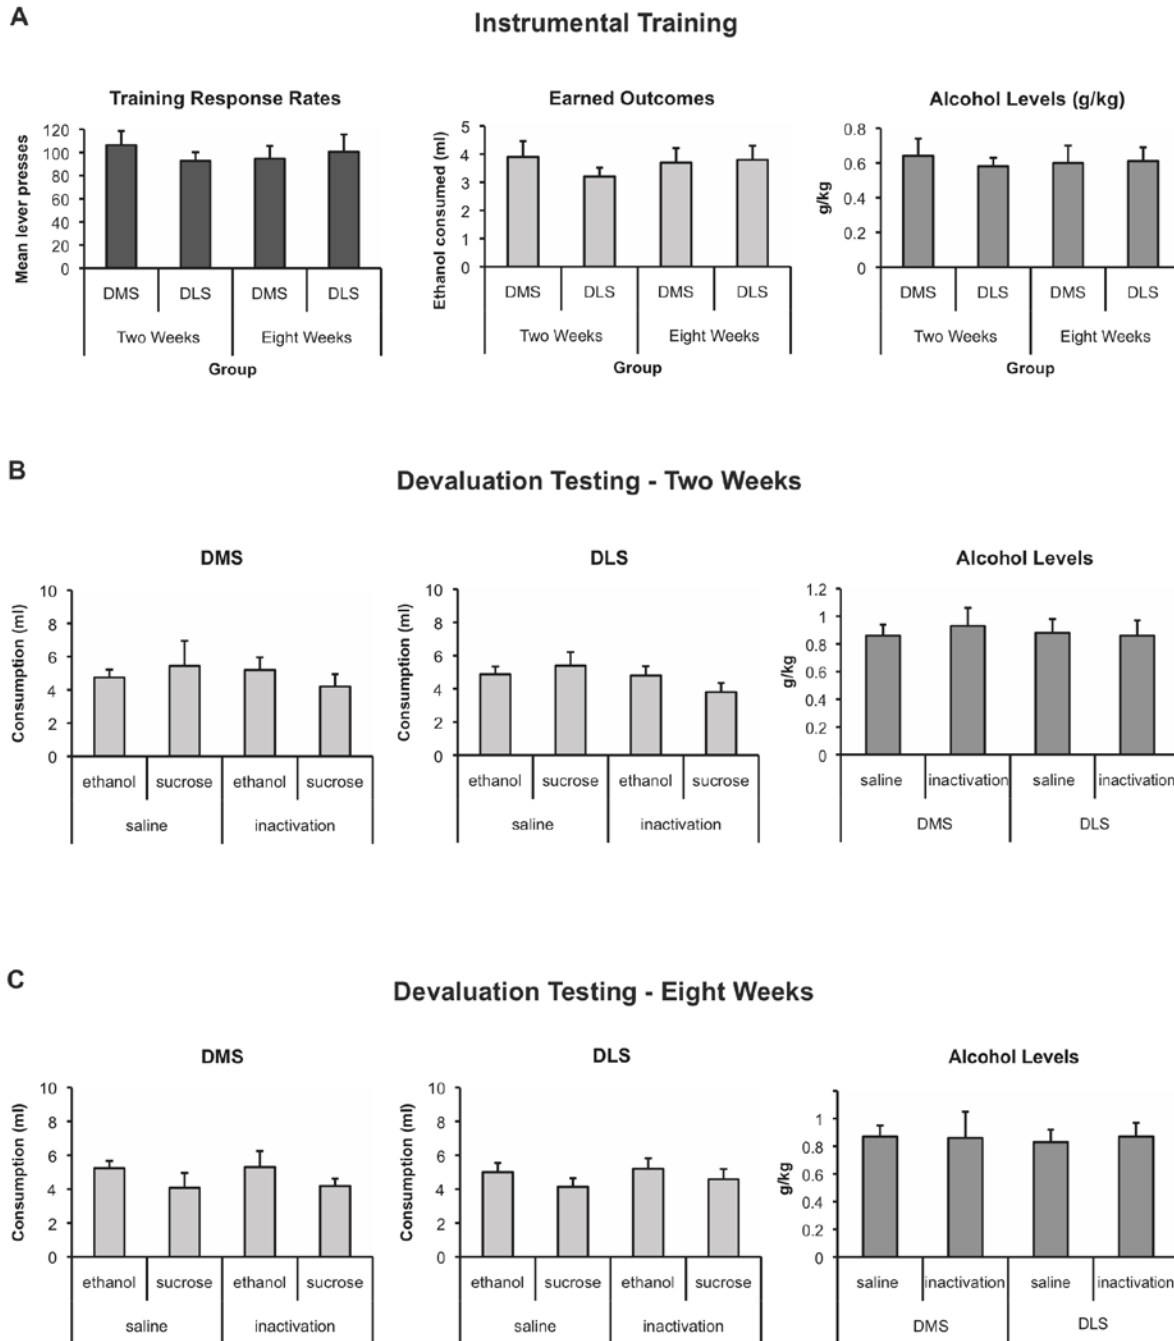

**Figure S4.** Training data and pre-feeding consumption for inactivation studies (Experiment 2). **(A)** Mean training response rates (left), earned outcomes (middle) and alcohol levels (g/kg; right) achieved during the three training days prior to devaluation testing for rats in either the dorsomedial striatum (DMS) or dorsolateral striatum (DLS) groups tested following either 2 or 8 weeks of training. There were no group differences in any of these measures [response rate:  $F(3,42) = .42, p > .05$ ; earned outcomes:  $F(3,42) = .35, p > .05$ ; g/kg:  $F(3,42) = .23, p > .05$ ]. **(B)** Consumption of ethanol or sucrose during the devaluation testing for rats in the DMS (left) and DLS (middle) groups and alcohol levels achieved as a result of this consumption (right) for rats tested after 2 weeks of training. For ethanol consumption, there was no effect of group [ $F(1,20)$

= .01,  $p > .05$ ], no effect of inactivation [ $F(1,20) = .49, p > .05$ ] and no interaction [ $F(1,20) = .17, p > .05$ ]. Similarly, there were no differences for sucrose consumption or g/kg [ $F_s < 1$ ]. (C) Consumption of ethanol or sucrose during the devaluation testing for rats in the DMS (left) and DLS (middle) groups and alcohol levels achieved as a result of this consumption (right) for rats tested after 8 weeks of training. There were no group differences in any of these measures [ethanol:  $F(1,22) = .53, p > .05$ ; sucrose:  $F(1,22) = .4, p > .05$ ; g/kg:  $F(1,22) = .13, p > .05$ ]. For ethanol consumption, there was no effect of group [ $F(1,22) = .04, p > .05$ ], no effect of inactivation [ $F(1,20) = .22, p > .05$ ] and no interaction [ $F(1,20) = .48, p > .05$ ]. Similarly, there were no differences for sucrose consumption or g/kg [ $F_s < 1$ ].
